# Supplementary material for: Enhanced metastatic potential in the MB49 urothelial carcinoma model
Source: PubMed Central journal article supplement (PMC6520404; doi:10.1038/s41598-019-43641-5), 2019-05-15
Supplement: 41598_2019_43641_MOESM1_ESM.pdf [file 41598_2019_43641_MOESM1_ESM.pdf]

## Supplementary Information

### Enhanced metastatic potential in the MB49 urothelial carcinoma model

**Yu-Ru Liu<sup>1</sup>, Peng-Nien Yin<sup>1</sup>, Christopher R. Silvers<sup>1</sup>, Yi-Fen Lee<sup>\*1,2</sup>**

Departments of <sup>1</sup>Urology and <sup>2</sup>Pathology, University of Rochester Medical Center, Rochester NY, 14642, USA

**Corresponding Author:** Yi-Fen Lee, Department of Urology, University of Rochester Medical Center, 601 Elmwood Ave, Box 656, Rochester, NY 14642. Phone: (585) 275-9702. E-mail: [yifen\\_lee@urmc.rochester.edu](mailto:yifen_lee@urmc.rochester.edu)

<sup>+</sup>The first two authors contributed equally to this work.

**Supplementary Table 1.** Incidence of lung metastasis in a pilot test of MB49 sub-clones.

| <b>MB49 line</b> | <b>mice with lung metastases</b> |
|------------------|----------------------------------|
| parental         | 0/2                              |
| F1               | 0/3                              |
| F2               | 0/3                              |
| F3               | 0/3                              |
| S1               | 3/3                              |
| S2               | 1/2                              |
| S3               | 0/4                              |
| S4               | 1/4                              |
| S5               | 1/6                              |

The lung metastasis incidence of eight candidate MB49 sub-clones was measured 10-21 days following subcutaneous implantation into C57BL/6 mice.

**Supplementary Table 2.** Primer sequences used in qPCR.

|                               | <b>Gene name</b>                      | <b>Forward</b>               | <b>Reverse</b>                |
|-------------------------------|---------------------------------------|------------------------------|-------------------------------|
|                               | <b>DCN</b>                            | TTCCTACTCGGCTGT<br>GAGTC     | AAGTTGAATGGCAG<br>AACGC       |
| <b>Basal marker genes</b>     | <b>CD44</b>                           | TTTGCAATGCAGTC<br>AACAGTC    | GTTACACCCCAATC<br>TTCATGTCCAC |
|                               | <b>KRT5</b>                           | TCTGCCATCACCCC<br>ATCTGT     | CCTCCGCCAGAACT<br>GTAGGA      |
|                               | <b>KRT6B</b>                          | GCTCAAACATAGGC<br>TCCAGGTT   | CCATCAAGAGTCAA<br>ACTAGCCAC   |
|                               | <b>KRT14</b>                          | AGCGGCAAGAGTGA<br>GATTTCT    | CCTCCAGGTTATTCT<br>CCAGGG     |
| <b>CSC marker genes</b>       | <b>ALDH1A1</b>                        | TGATGTTGTCAGCC<br>CAGTGC     | TTGCGACTGTCTTG<br>AGC         |
|                               | <b>CD49</b>                           | TCTATTCCTGTTGCC<br>GTCACAA   | CGATGACAGCATT<br>CCCGATA      |
|                               | <b>CK14</b>                           | CGGCCCACTGAGAT<br>CAAAGAC    | AAATGCCAAGCCCC<br>ATTTTAGG    |
|                               | <b>CD90</b>                           | CTGCAGCTAGGGGA<br>GTCCAG     | GATGACCCCTAATG<br>TCCAGGTC    |
| <b>EMT marker genes</b>       | <b>ITGA5</b>                          | CTTCTCCGTGGAGTT<br>TTACCG    | GCTGTCAAATTGAA<br>TGGTGGTG    |
|                               | <b>ITGB1</b>                          | ATGCCAAATCTTGC<br>GGAGAAT    | TTTGCTGAGATTGG<br>TGACATT     |
|                               | <b>ACTA2 (<math>\alpha</math>SMA)</b> | GTCCAGACATCAG<br>GGAGTAA     | TCGGATACTTCAGA<br>GTCAGGA     |
|                               | <b>FN1</b>                            | GCTCAGCAAATCGT<br>GCAGC      | CTAGGTAGGTCCGT<br>TCCCACT     |
|                               | <b>CDH2 (N-cadherin)</b>              | TCGCTGCTTTCATAC<br>TGAAC TTT | AGCGCAGTCTTACC<br>GAAGG       |
|                               | <b>TWIST1</b>                         | GGACAAGCTGAGCA<br>AGATTCA    | CGGAGAAGGCGTAG<br>CTGAG       |
| <b>Internal control genes</b> | <b>GOT1</b>                           | GCGCCTCCATCAGT<br>CTTTG      | ATTCATCTGTGCGG<br>TACGCTC     |
|                               | <b>HPRT</b>                           | TCAGTCAACGGGGG<br>ACATAAA    | GGGGCTGTACTGCT<br>TAACCAG     |
|                               | <b>GAPDH</b>                          | AGGTCGGTGTGAAC<br>GGATTTG    | TGTAGACCATGTAG<br>TTGAGGTCA   |
